# Supplementary material for: Macroporous Mannitol Granules Produced by Spray Drying and Sacrificial Templating
Source: MDPI journal article supplement (doi:10.3390/ma16010025), 2022-12-21
Supplement: s1 [file s1]

## Supplementary material

### “Spray-drying of microporous granules of mannitol excipient using polystyrene beads as sacrificial template”

Morgane Valentin<sup>1\*</sup>, Damien Coibion<sup>1</sup>, Bénédicte Vertruyen<sup>1</sup>, Cédric Malherbe<sup>2</sup>, Rudi Cloots<sup>1</sup>, Frédéric Boschini<sup>1</sup>

<sup>1</sup> Group of Research in Energy and Environment from Materials, CESAM Research Unit, University of Liège, Liège 4000, Belgium

<sup>2</sup> Mass Spectrometry Laboratory, MolSys Research Unit, University of Liège, Liège 4000, Belgium

\*Corresponding authors. Email address : morgane.valentin@uliege.be (M.V.), b.vertruyen@uliege.be (B.V.)

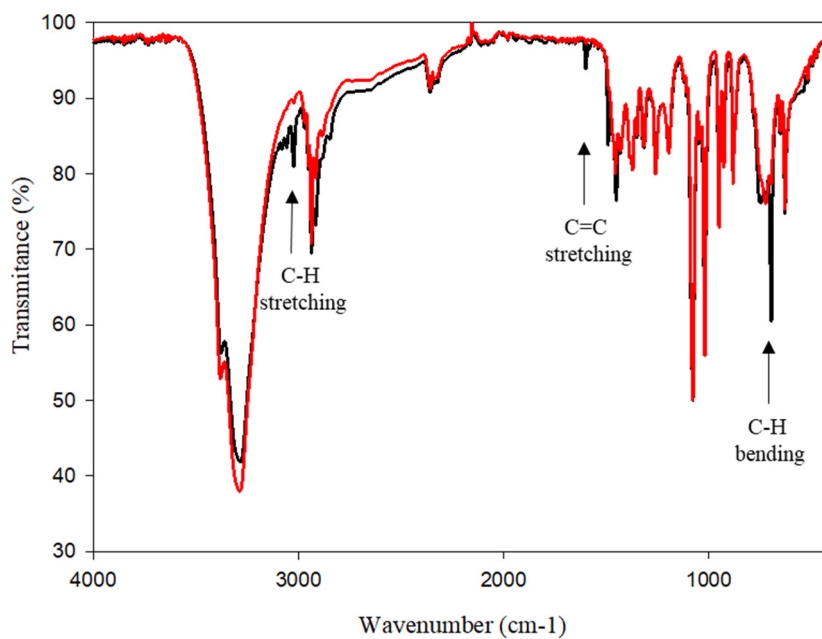

**Figure S1.** IR spectra before (black curve) and after (red curve) etching of PS beads (B-1/1 sample)
